# Supplementary material for: Two viologen-functionalized pyrazolide-based metal–organic frameworks for efficient CO2photoreduction reaction
Source: Royal Society of Chemistry journal article supplement (doi:10.1039/d2ta09799k), 2023-01-01
Supplement: d2ta09799k1.pdf [file d2ta09799k1.pdf]

# Two Viologen-Functionalized Pyrazolide-Based Metal-Organic Frameworks for Efficient CO<sub>2</sub> Photoreduction Reaction

Yuxin Xie<sup>a, b</sup>, Chenghao Yao<sup>a, b</sup>, Lei Li<sup>a, b\*</sup>, Zhan Lin<sup>a, b\*</sup>

<sup>a</sup> *Jieyang Branch of Chemistry and Chemical Engineering Guangdong Laboratory, Jieyang 515200, China*

<sup>b</sup> *Guangdong Provincial Key Laboratory of Plant Resources Biorefinery, School of Chemical Engineering and Light Industry, Guangdong University of Technology, Guangzhou 510006, China*

## 1. Synthesis of 1,1'-bis(2,4-dinitrophenyl)-[4,4'-bipyridine]-1,1'-dium

As shown in Scheme S1, the 1,1'-bis(2,4-dinitrophenyl)-[4,4'-bipyridine]-1,1'-dium dichloride (denoted as L<sub>11</sub>) was synthesized according to the previous report literature procedure with a little modify. Typically, 4,4'-bipyridine (3.6 g, 23 mmol) and 1-chloro-2,4-dinitrobenzene (16.5 g, 81 mmol) were dissolved in 70 mL of CH<sub>3</sub>CN. The reaction mixture was stirred under N<sub>2</sub> atmosphere at 85 °C for 72 h. The final suspension was filtered and subsequently washed with CH<sub>3</sub>CN (3×20 mL), faint yellow solid is obtained. Then the resulting faint yellow powder was dried under vacuum at 80 °C for 12 h to give the product L<sub>11</sub>. L<sub>11</sub>: <sup>1</sup>H NMR (400 MHz, D<sub>2</sub>O, Figure S1): δ 9.43~9.46 (CH, 4H), 9.37 (CH, 2H), 8.87~8.93 (CH, 6H) and 8.25~8.28 ppm (CH, 2H). Elemental analysis: For C<sub>22</sub>H<sub>14</sub>O<sub>8</sub>N<sub>6</sub>Cl<sub>2</sub> (M.W. 561.29): C, 47.08; H, 2.51; N, 14.97 wt%.

## 2. Synthesis of 1,1'-di(1H-pyrazol-4-yl)-[4,4'-bipyridine]-1,1'-dium dichloride

As shown in Scheme S1, to 2 g (3.56 mmol) of 1,1'-bis(2,4-dinitrophenyl)-

[4,4'-bipyridine]-1,1'-dium dichloride and 0.62 g (7.46 mmol) of 4-Amino-1H-pyrazole in 50 mL of ethanol. The mixture is stirred together at 80 °C for 48 h, then cooled to room temperature. The atrovirens product was collected by centrifugation and washing several times with ethanol, followed by vacuum drying at 60 °C for 12 h. The ligand was obtained as an atrovirens powder. Ligand: <sup>1</sup>H NMR (400 MHz, D<sub>2</sub>O, Figure S2): δ 13.67~13.69 (NH, 2H), δ 9.27~9.32 (CH, 4H), 8.63-8.67 (CH, 4H) and 8.33~8.37 ppm (CH, 4H). For C<sub>16</sub>H<sub>14</sub>N<sub>6</sub>Cl<sub>2</sub> (M.W. 361.23, Figure S3): C, 53.15; H, 3.88; N, 23.25 wt%.

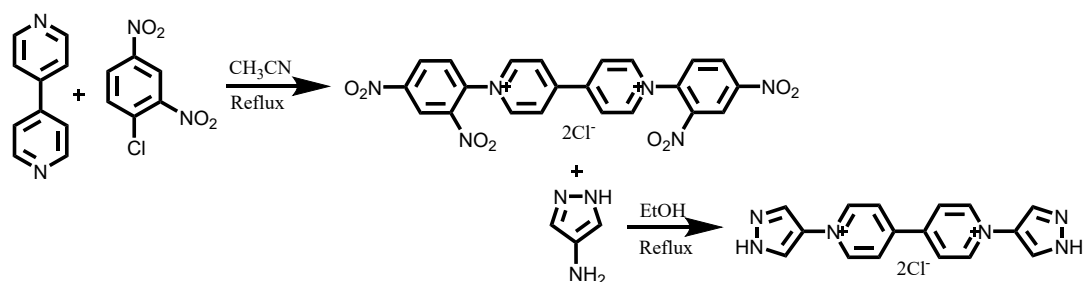

Scheme 1. Schematic illustration of the synthesis process of ligand.

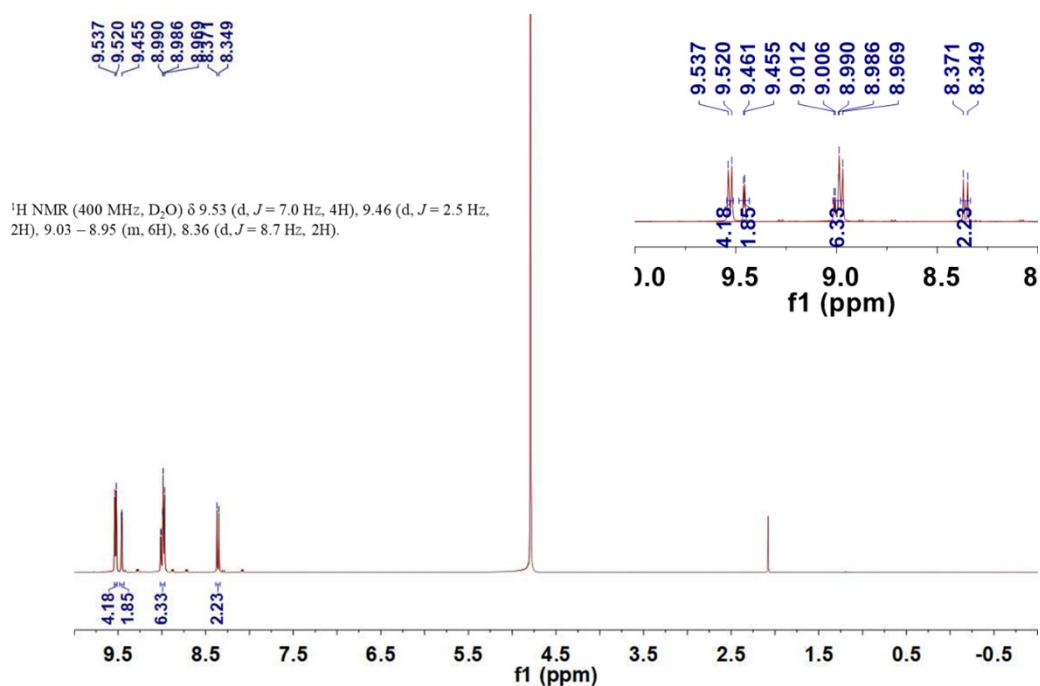

Figure S1. The <sup>1</sup>H NMR (400 MHz, D<sub>2</sub>O) of L<sub>11</sub> (1,1'-bis(2,4-dinitrophenyl)-[4,4'-bipyridine]-1,1'-dium dichloride).

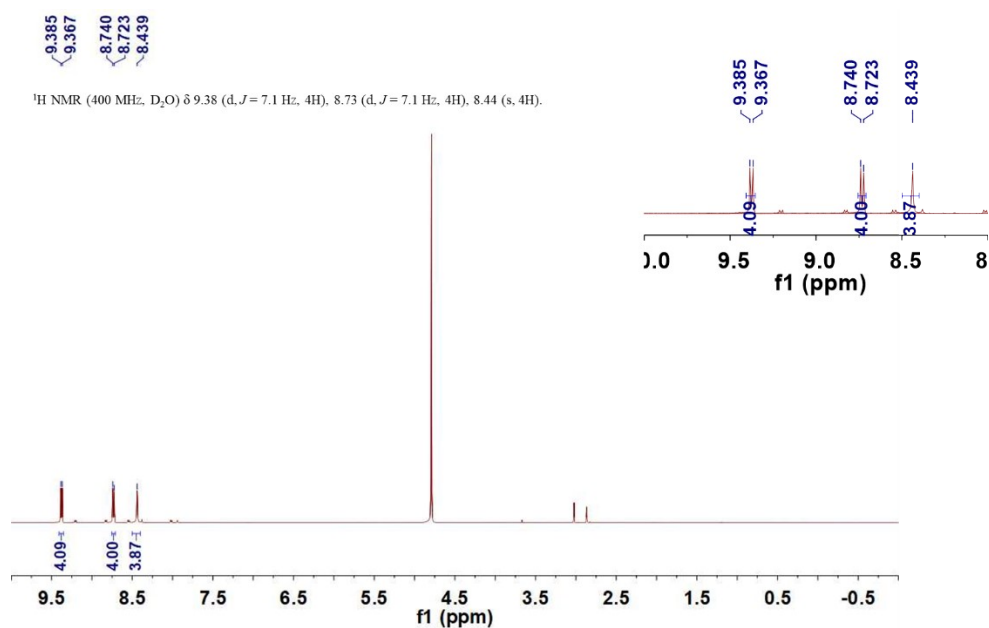

Figure S2. The <sup>1</sup>H NMR (400 MHz, D<sub>2</sub>O) of ligand(1,1'-di(1H-pyrazol-4-yl)-[4,4'-bipyridine]-1,1'-dium dichloride).

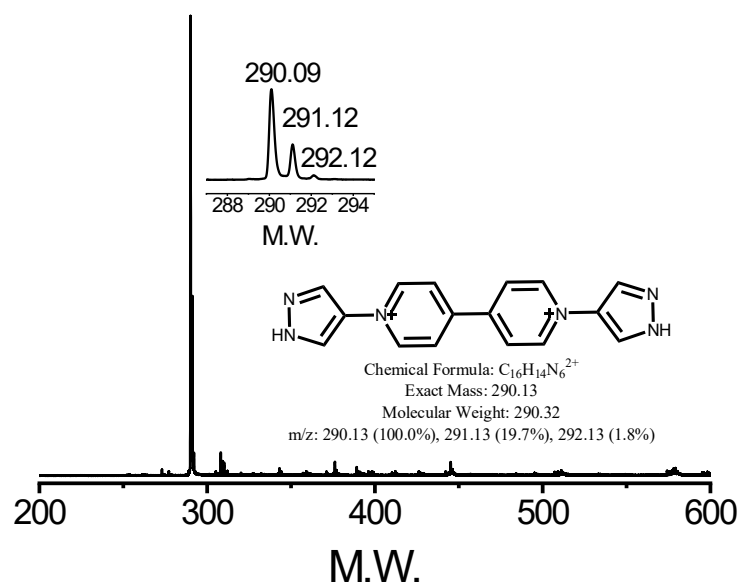

Figure S3. The MS ( mass spectrometry) of ligand.

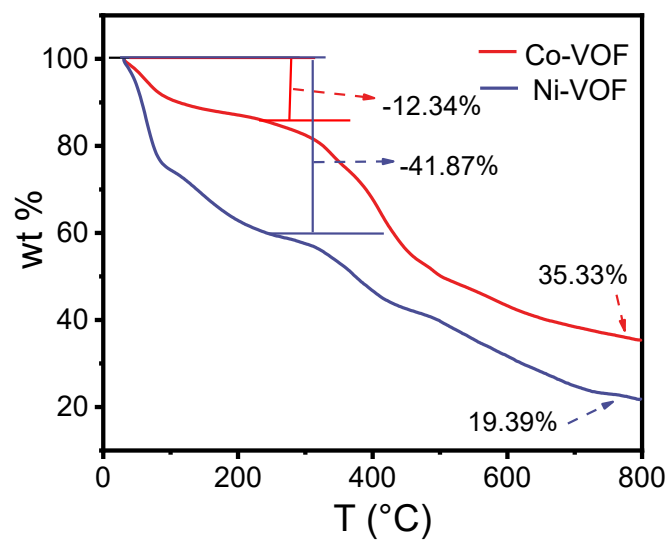

Figure S4. TG curves in N<sub>2</sub>.

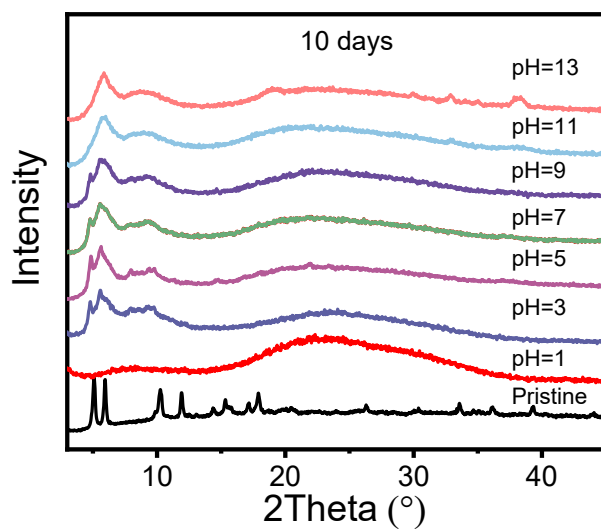

Figure S5. Powder X-ray diffraction (PXRD) patterns of Ni-VOF under different conditions.

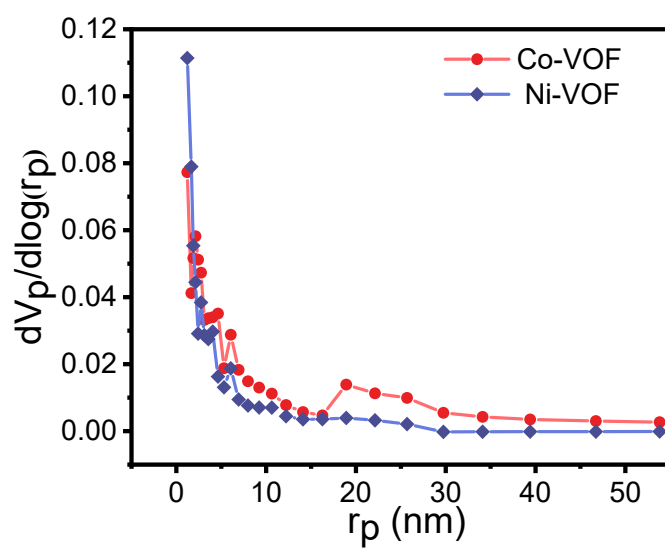

Figure S6. The pore distribution of Ni-VOF and Co-VOF.

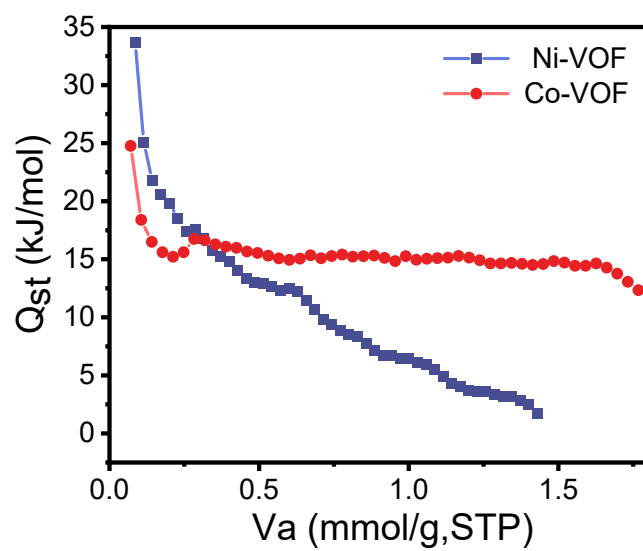

Figure S7. Isothermic heat of adsorption ( $Q_{st}$ ) profiles of the samples for  $CO_2$ .

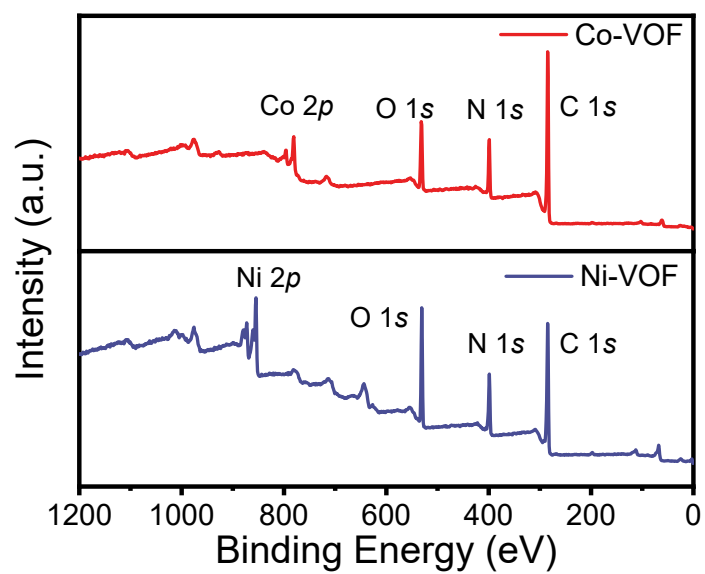

Figure S8. XPS survey spectrum of Co-VOF and Ni-VOF.

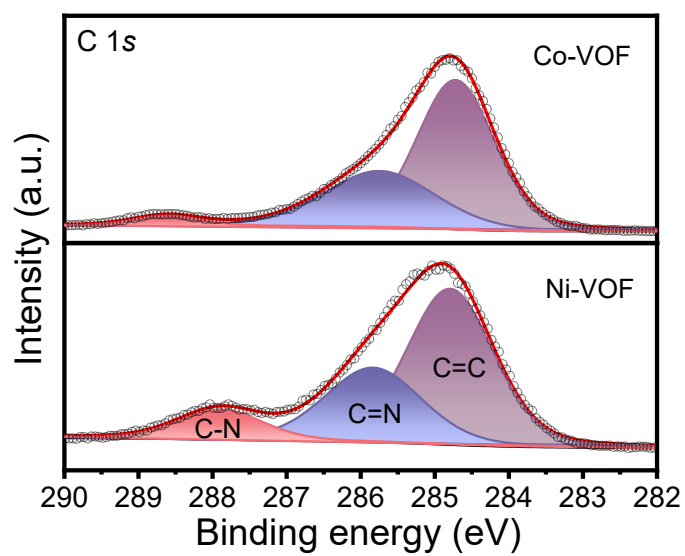

Figure S9. C 1s of Co-VOF and Ni-VOF.

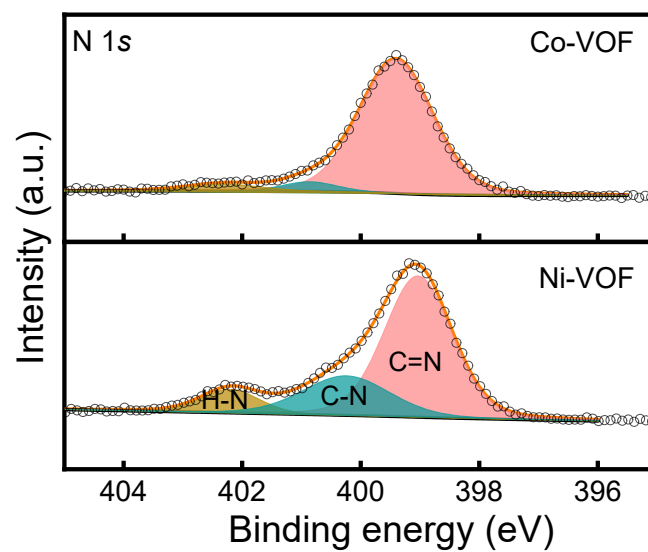

Figure S10. N 1s of Co-VOF and Ni-VOF.

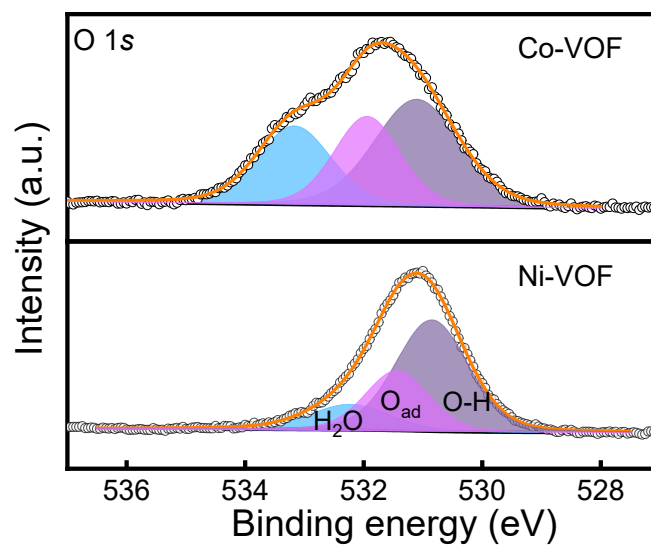

Figure S11. O 1s of Co-VOF and Ni-VOF.

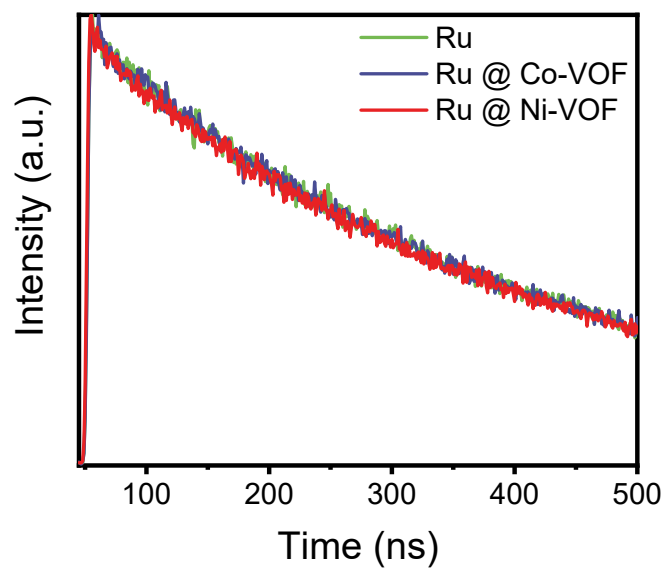

Figure S12. TCSPC experiment of Ni-VOF and Co-VOF. The samples were excited with a  $\lambda_{\text{ex}} = 450$  nm laser and emission was observed at  $\lambda_{\text{em}} = 625$  nm.

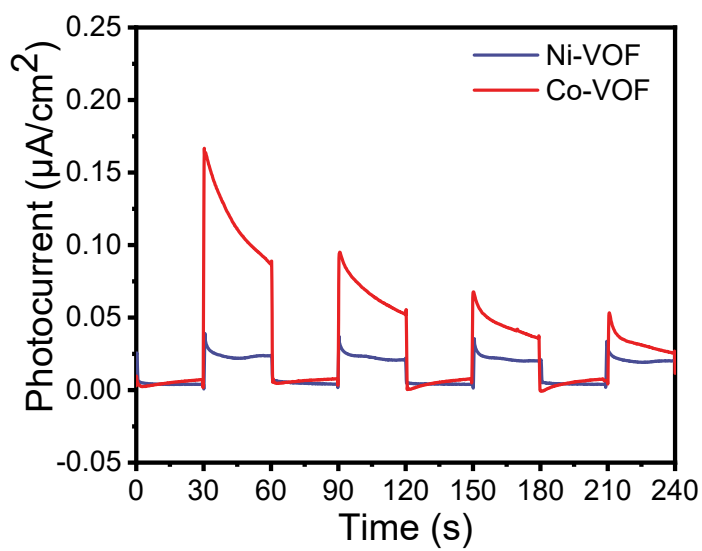

Figure S13. Transient photocurrent curves of Ni-VOF and Co-VOF.



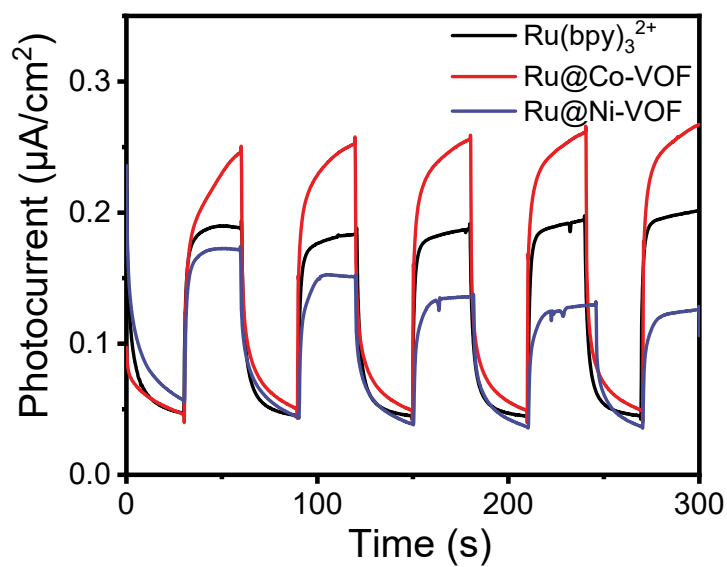

Figure S14. Transient photocurrent curves  $\text{Ru}(\text{bpy})_3^{2+}$ ,  $\text{Ru@Ni-VOF}$  and  $\text{Ru@Co-VOF}$ .

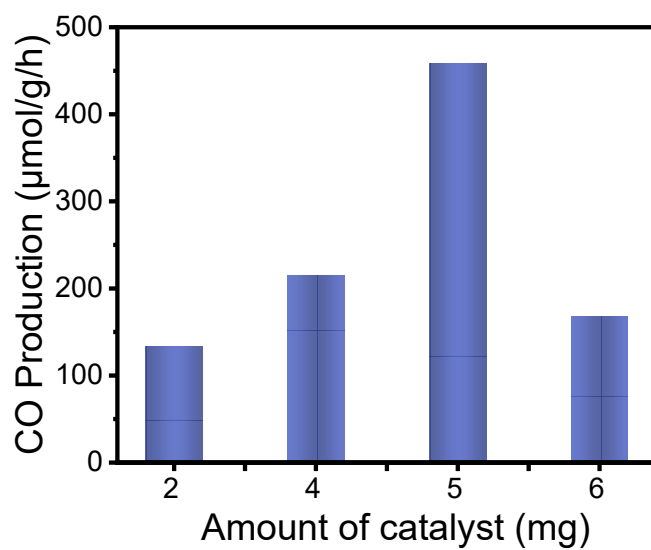

Figure S15. Effect of Co-VOF dosage on the formation rate of CO.

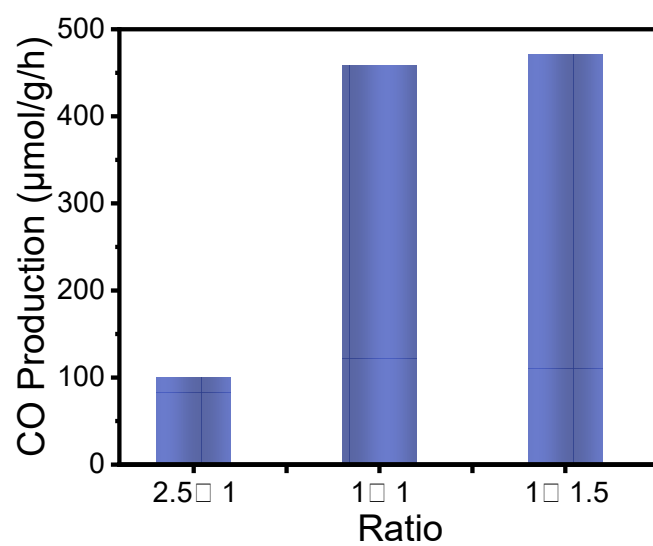

Figure S16. Effect of Co-VOF and Ru dosage ratio on the formation rate of CO.

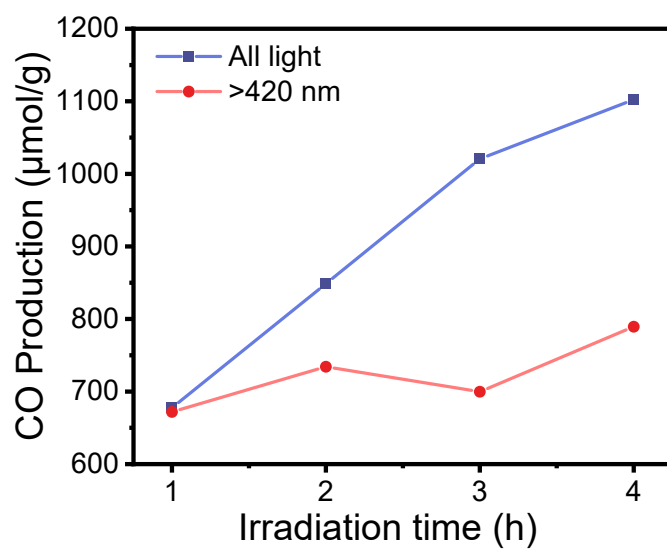

Figure S17. CO<sub>2</sub> photoreduction performance under various reaction conditions.

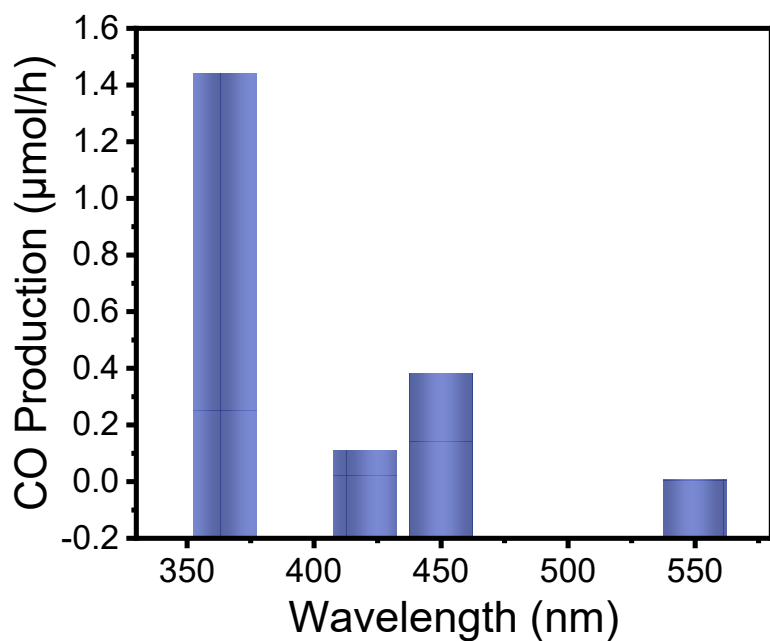

Figure S18. CO<sub>2</sub> photoreduction performance vs. wavelength.

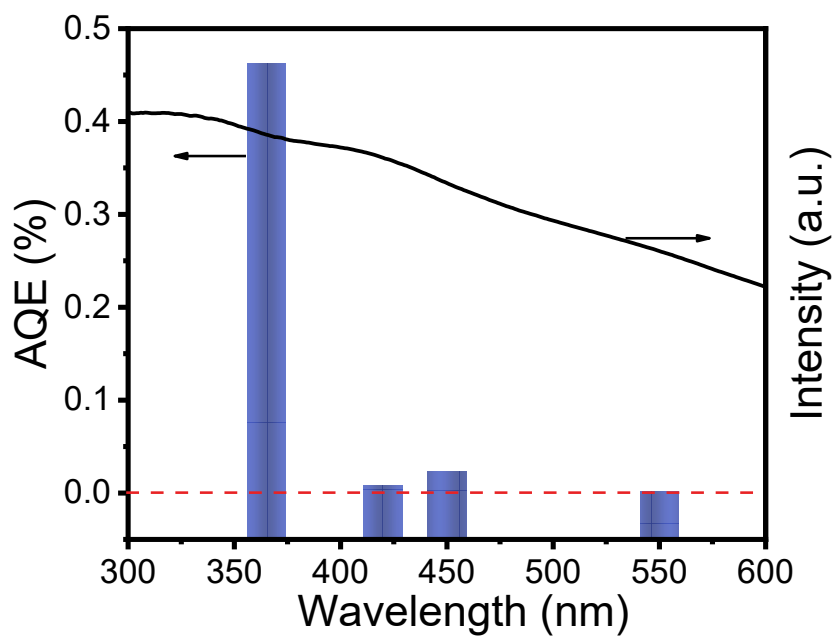

Figure S19. CO<sub>2</sub> photoreduction AQE vs. wavelength.

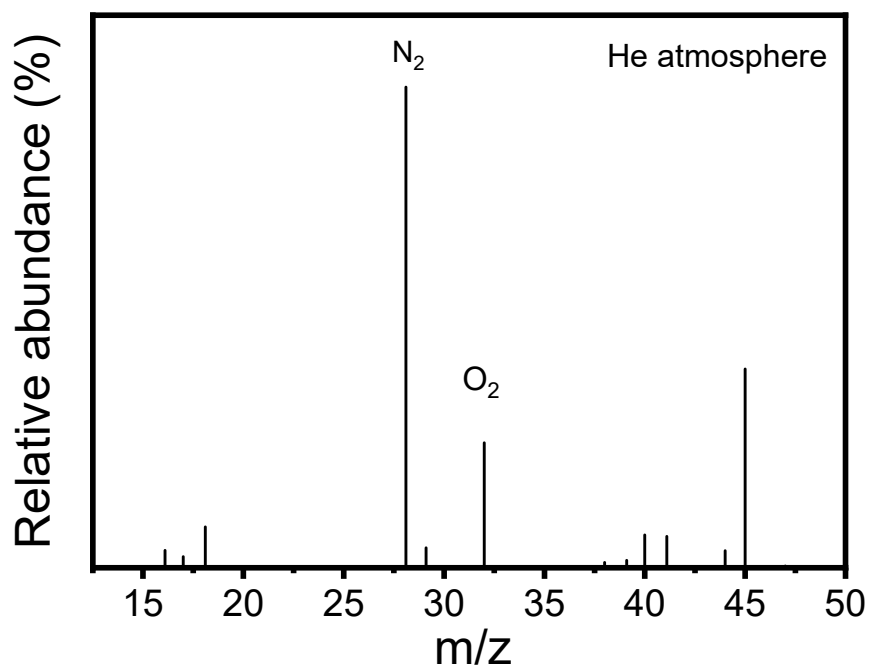

Figure S20. Mass spectra of headspace gas over Ru@Co-VOF in the photocatalytic system under He atmosphere.

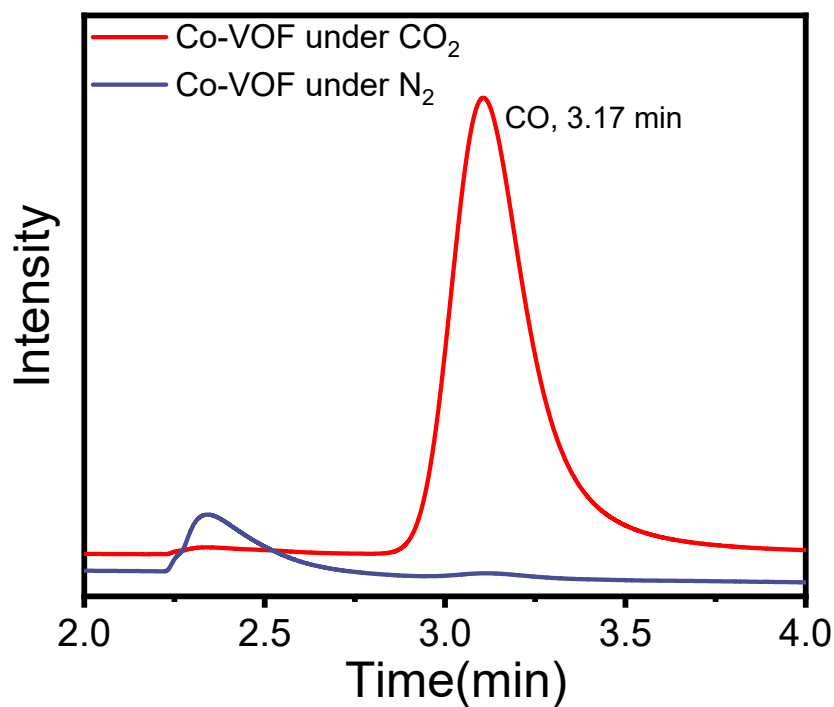

Figure S21. GC curve of CO over Ru@Co-VOF in the photocatalytic reduction under CO<sub>2</sub> and N<sub>2</sub> atmosphere.

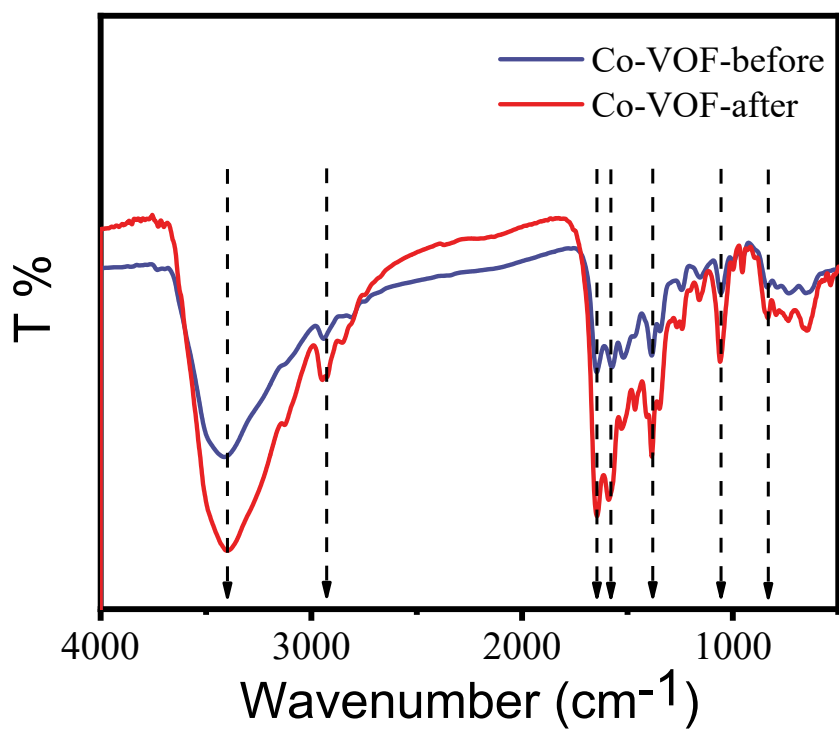

Figure S22. FT-IR spectra of Co-VOF before and after photocatalytic reaction.

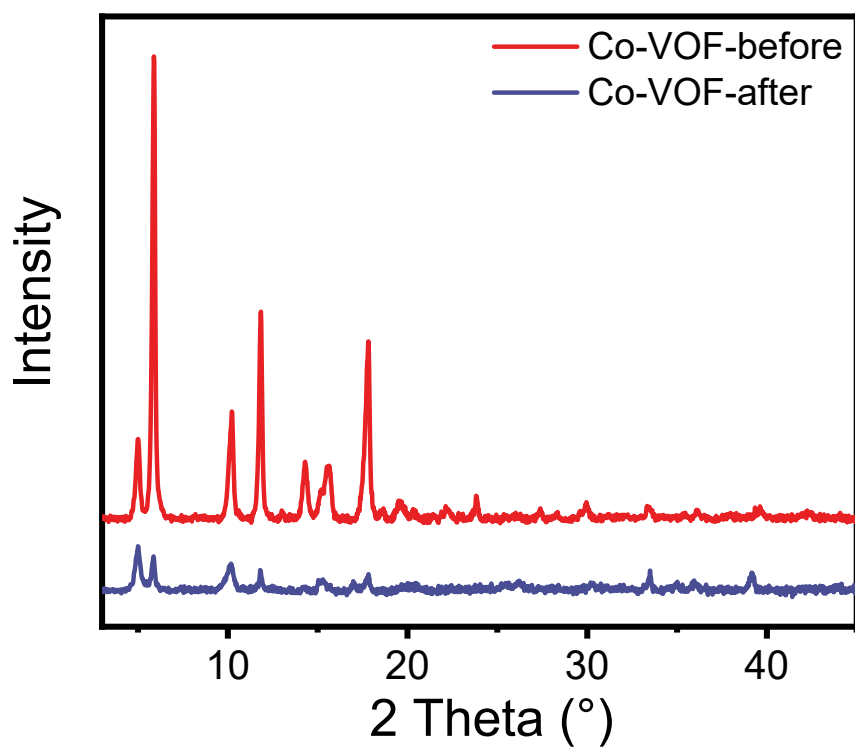

Figure S23. PXRD pattern of Co-VOF before and after photocatalytic reaction.

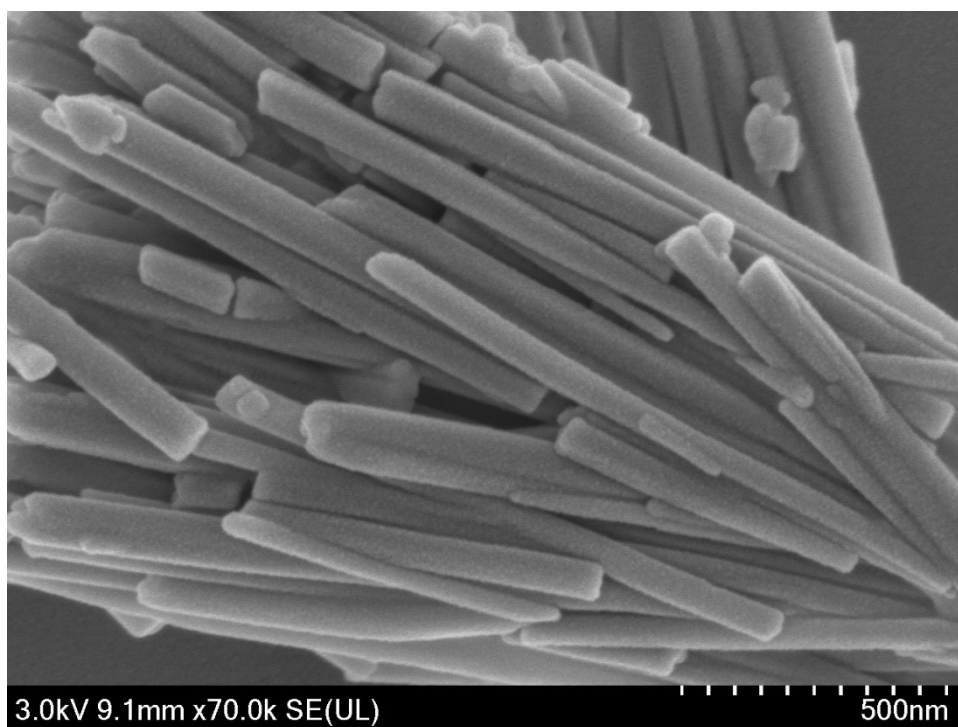

Figure S24. SEM image of Co-VOF after photocatalytic reaction.

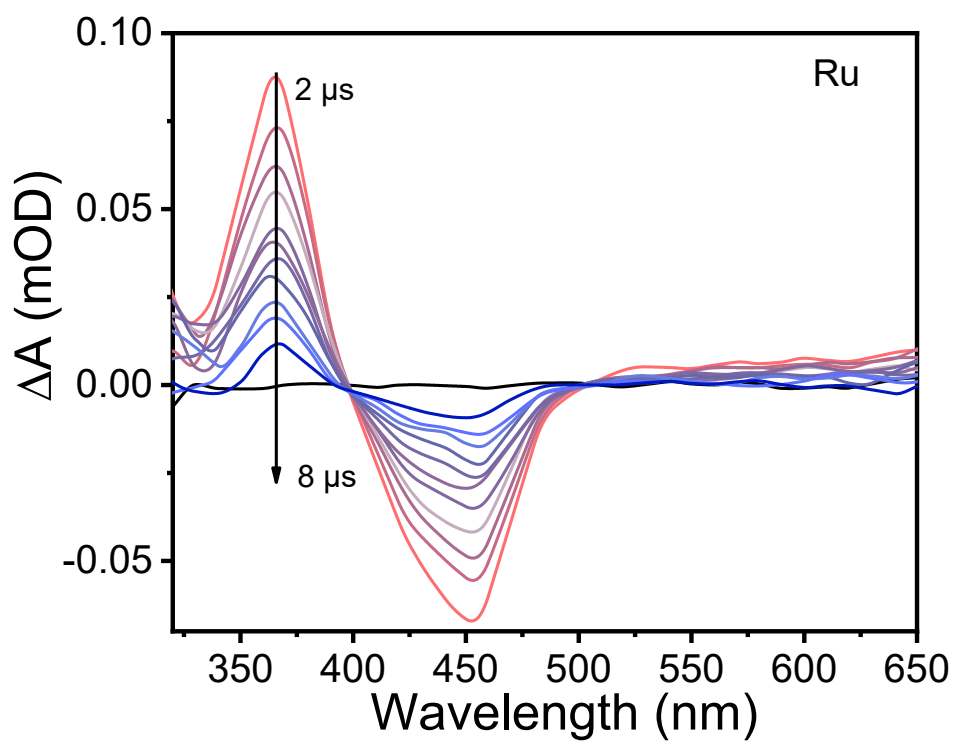

Figure S25. TA spectra of Ru(bpy)<sub>3</sub><sup>2+</sup> (50 μM).

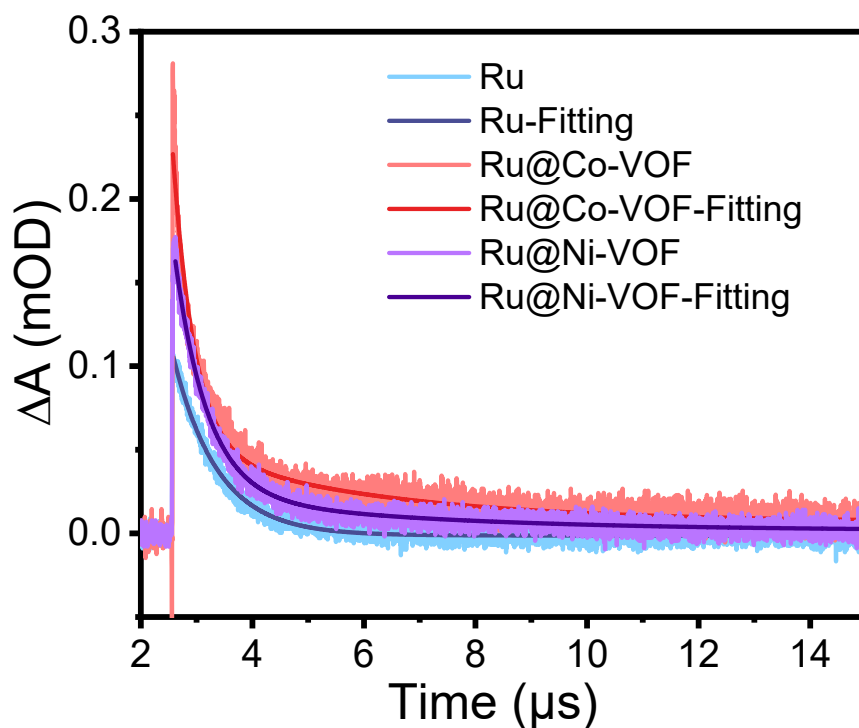

Figure S26. Kinetic traces of Ru, Ru @ Co-VOF, and Ru @ Ni-VOF at 370 nm. Conditions:  $\lambda_{\text{ex}} = 355 \text{ nm}$  in  $\text{CH}_3\text{CN}$  under an Ar atmosphere.

Table S1. Some elements analysis of Ni-VOF and Co-VOF.

| Simple | N (%) | C (%) | H (%) |
|--------|-------|-------|-------|
| Co-VOF | 14.71 | 33.22 | 3.991 |
| Ni-VOF | 12.91 | 30.55 | 6.444 |

Table S2. Parameters for fitting the kinetic decay curve of the PL spectrum.

| Sample      | Recovery Time (ns) |          | Average $\tau$ (ns) |
|-------------|--------------------|----------|---------------------|
| Ru          | $\tau_1$           | 70.1453  | 157.9874            |
|             | $\tau_2$           | 160.1331 |                     |
| Ru @ Ni-VOF | $\tau_1$           | 2.66658  | 140.5678            |
|             | $\tau_2$           | 158.1625 |                     |
| Ru @ Co-VOF | $\tau_1$           | 70.22946 | 157.9584            |
|             | $\tau_2$           | 160.4134 |                     |

Table S3 Comparison of the performances of photocatalytic CO<sub>2</sub> conversion in similar systems.

| catalyst                                        | photosensitizer/<br>sacrificial agent                  | light<br>source                           | irradiati<br>on time | catalyst<br>dosage     | reaction kinetic<br>rate ( $\mu\text{mol/h/g}$ ) | ref.      |
|-------------------------------------------------|--------------------------------------------------------|-------------------------------------------|----------------------|------------------------|--------------------------------------------------|-----------|
| Co-VOF                                          | Ru(bpy) <sub>3</sub> <sup>2+</sup><br>TEOA             | 300W Xe<br>---                            | 3h                   | 5mg                    | CO 458.66                                        | this work |
| Ni-MOF                                          | Ru(bpy) <sub>3</sub> <sup>2+</sup><br>TEOA             | 300W Xe<br>---                            | 3h                   | 5mg                    | CO 52.33                                         | this work |
| Co(P <sub>4</sub> Mo <sub>6</sub> )             | Ru(bpy) <sub>3</sub> <sup>2+</sup><br>TEOA             | 300W Xe<br>400 nm < $\lambda$ <<br>780 nm | 10h                  | 30mg                   | CO 1.07                                          | 1         |
| MOF-808                                         | Ru(bpy) <sub>3</sub> <sup>2+</sup><br>H <sub>2</sub> O | 300W Xe<br>400 nm < $\lambda$ <<br>800 nm | 6h                   | 3mg                    | CO 440                                           | 2         |
| Re-Ru@MIL-<br>101-NH <sub>2</sub> (Al)          | Ru(bpy) <sub>3</sub> <sup>2+</sup><br>TEOA             | 5W LED<br>$\lambda=450$ nm                | 10h                  | 3.5mg                  | CO 19.19                                         | 3         |
| ZnFe <sub>2</sub> O <sub>4</sub> /FeP-<br>CTFs  | Ru(bpy) <sub>3</sub> <sup>2+</sup><br>TEOA             | 300W Xe<br>$\lambda\geq 420$ nm           | 2h                   | 5mg                    | CO 178                                           | 4         |
| Ni COFs                                         | Ru(bpy) <sub>3</sub> <sup>2+</sup><br>TEOA             | 300W Xe<br>$\lambda\geq 420$ nm           | 5h                   | 10mg                   | CO 810                                           | 5         |
| NH <sub>2</sub> -MIL-101(Fe)                    | ---<br>TEOA                                            | 300W Xe<br>400 nm < $\lambda$ <<br>780 nm | 5h                   | 5mg                    | CO 17.52                                         | 6         |
| ZnMn <sub>2</sub> O <sub>4</sub>                | ---<br>---                                             | 500W Xe<br>---                            | 8h                   | 100mg                  | CO 26.2                                          | 7         |
| BIF-101                                         | Ru(bpy) <sub>3</sub> <sup>2+</sup><br>TEOA             | 300W Xe<br>$\lambda\geq 400$ nm           | 10h                  | 10mg                   | CO 5830                                          | 8         |
| Co(II)-MOF                                      | Ru(bpy) <sub>3</sub> <sup>2+</sup><br>BNAH             | 300W Xe<br>$\lambda\geq 400$ nm           | 6h                   | 4mg                    | CO 456                                           | 9         |
| Co <sub>1</sub> Ni <sub>2</sub> -MOF            | Ru(phen) <sub>3</sub> <sup>2+</sup><br>TEOA            | 300W Xe<br>$\lambda\geq 420$ nm           | 4h                   | 2mg                    | CO 1160                                          | 10        |
| Fe-MNS                                          | Ru(bpy) <sub>3</sub> <sup>2+</sup><br>TEOA             | 300W Xe<br>$\lambda\geq 420$ nm           | 3h                   | 5mg                    | CO 1637                                          | 11        |
| Co/CTF-1                                        | Ru(bpy) <sub>3</sub> <sup>2+</sup><br>TEOA             | 300W Xe<br>$\lambda\geq 420$ nm           | 4h                   | 10mg                   | CO 50                                            | 12        |
| Co-PMOF/GR                                      | ---<br>---                                             | 300W Xe<br>$\lambda\geq 420$ nm           | 8h                   | 10mg                   | CO 20.25                                         | 13        |
| Co-MOF-74                                       | Ru(bpy) <sub>3</sub> <sup>2+</sup><br>TEOA             | 300W Xe<br>400 nm < $\lambda$ <<br>800 nm | 2h                   | 0.5<br>$\mu\text{mol}$ | CO 2.01<br>$\mu\text{mol/h}$                     | 14        |
| Cu <sub>2</sub> O@Cu@UiO-<br>66-NH <sub>2</sub> | ---<br>TEOA                                            | 300W Xe<br>$\lambda>400$ nm               | 5h                   | 3mg                    | CO 20.9                                          | 15        |



## References:

1. J. Du, Y. Ma, X. Xin, H. Na, Y. Zhao, H. Tan, Z. Han, Y. Li and Z. Kang, *Chemical Engineering Journal*, 2020, **398**, 125–518.
2. S. Karmakar, S. Barman, F. A. Rahimi and T. K. Maji, *Energy & Environmental Science*, 2021, **14**, 2429-2440.
3. P. M. Stanley, C. Thomas, E. Thyraug, A. Urstoeger, M. Schuster, J. Hauer, B. Rieger, J. Warnan and R. A. Fischer, *ACS Catalysis*, 2021, **11**, 871-882.
4. Y.-l. Yan, Q.-J. Fang, J.-k. Pan, J. Yang, L.-l. Zhang, W. Zhang, G.-l. Zhuang, X. Zhong, S.-w. Deng and J.-g. Wang, *Chemical Engineering Journal*, 2021, **408**, 127-358.
5. W. Zhong, R. Sa, L. Li, Y. He, L. Li, J. Bi, Z. Zhuang, Y. Yu and Z. Zou, *J Am Chem Soc*, 2019, **141**, 7615-7621.
6. X. Y. Dao, J. H. Guo, Y. P. Wei, F. Guo, Y. Liu and W. Y. Sun, *Inorg Chem*, 2019, **58**, 8517-8524.
7. S. Yan, Y. Yu and Y. Cao, *Applied Surface Science*, 2019, **465**, 383-388.
8. Q.-L. Hong, H.-X. Zhang and J. Zhang, *Journal of Materials Chemistry A*, 2019, **7**, 17272-17276.
9. W.-M. Liao, J.-H. Zhang, Z. Wang, Y.-L. Lu, S.-Y. Yin, H.-P. Wang, Y.-N. Fan, M. Pan and C.-Y. Su, *Inorganic Chemistry*, 2018, **57**, 11436-11442.
10. J. Zhang, Y. Wang, H. Wang, D. Zhong and T. Lu, *Chinese Chemical Letters*, 2022, **33**, 2065-2068.
11. A. Mahmoud Idris, X. Jiang, J. Tan, Z. Cai, X. Lou, J. Wang and Z. Li, *J Colloid*

*Interface Sci*, 2022, **607**, 1180-1188.

12. J. Bi, B. Xu, L. Sun, H. Huang, S. Fang, L. Li and L. Wu, *Chempluschem*, 2019, **84**, 1149-1154.

13. L. Cheng, C. Wu, H. Feng and H. Liu, *Catalysis Science & Technology*, 2022, **12**, 7057-7064.

14. X. Deng, L. Yang, H. Huang, Y. Yang, S. Feng, M. Zeng, Q. Li and D. Xu, *Small*, 2019, **15**, 1902287.

15. S.-Q. Wang, X.-Y. Zhang, X.-Y. Dao, X.-M. Cheng and W.-Y. Sun, *ACS Applied Nano Materials*, 2020, **3**, 10437-10445.
